# Supplementary material for: Intrinsic control of muscle attachment sites matching
Source: eLife journal article supplement (doi:10.7554/elife.57547), 2020-07-24
Supplement: supp [file elife-57547-supp-v1.zip]

Archive with 12 entries (12 files):
- elife_poa_e57547_Figure_1_figure_supplement_1.pdf
- elife_poa_e57547_Figure_1_figure_supplement_2.pdf
- elife_poa_e57547_Figure_1_figure_supplement_3.pdf
- elife_poa_e57547_Figure_3_figure_supplement_1.pdf
- elife_poa_e57547_Figure_3_figure_supplement_2.pdf
- elife_poa_e57547_Figure_5_figure_supplement_1.pdf
- elife_poa_e57547_Figure_5_figure_supplement_2.pdf
- elife_poa_e57547_Figure_6_figure_supplement_1.pdf
- elife_poa_e57547_Figure_7_figure_supplement_1.pdf
- elife_poa_e57547_Video_1.avi
- elife_poa_e57547_Video_2.avi
- elife_poa_e57547_Transparent_Reporting_File.docx
