# Supplementary figures and images for: Intrinsic control of muscle attachment sites matching
Source: eLife journal article supplement (doi:10.7554/elife.57547), 2020-07-24

Figure 1 - Sup 1

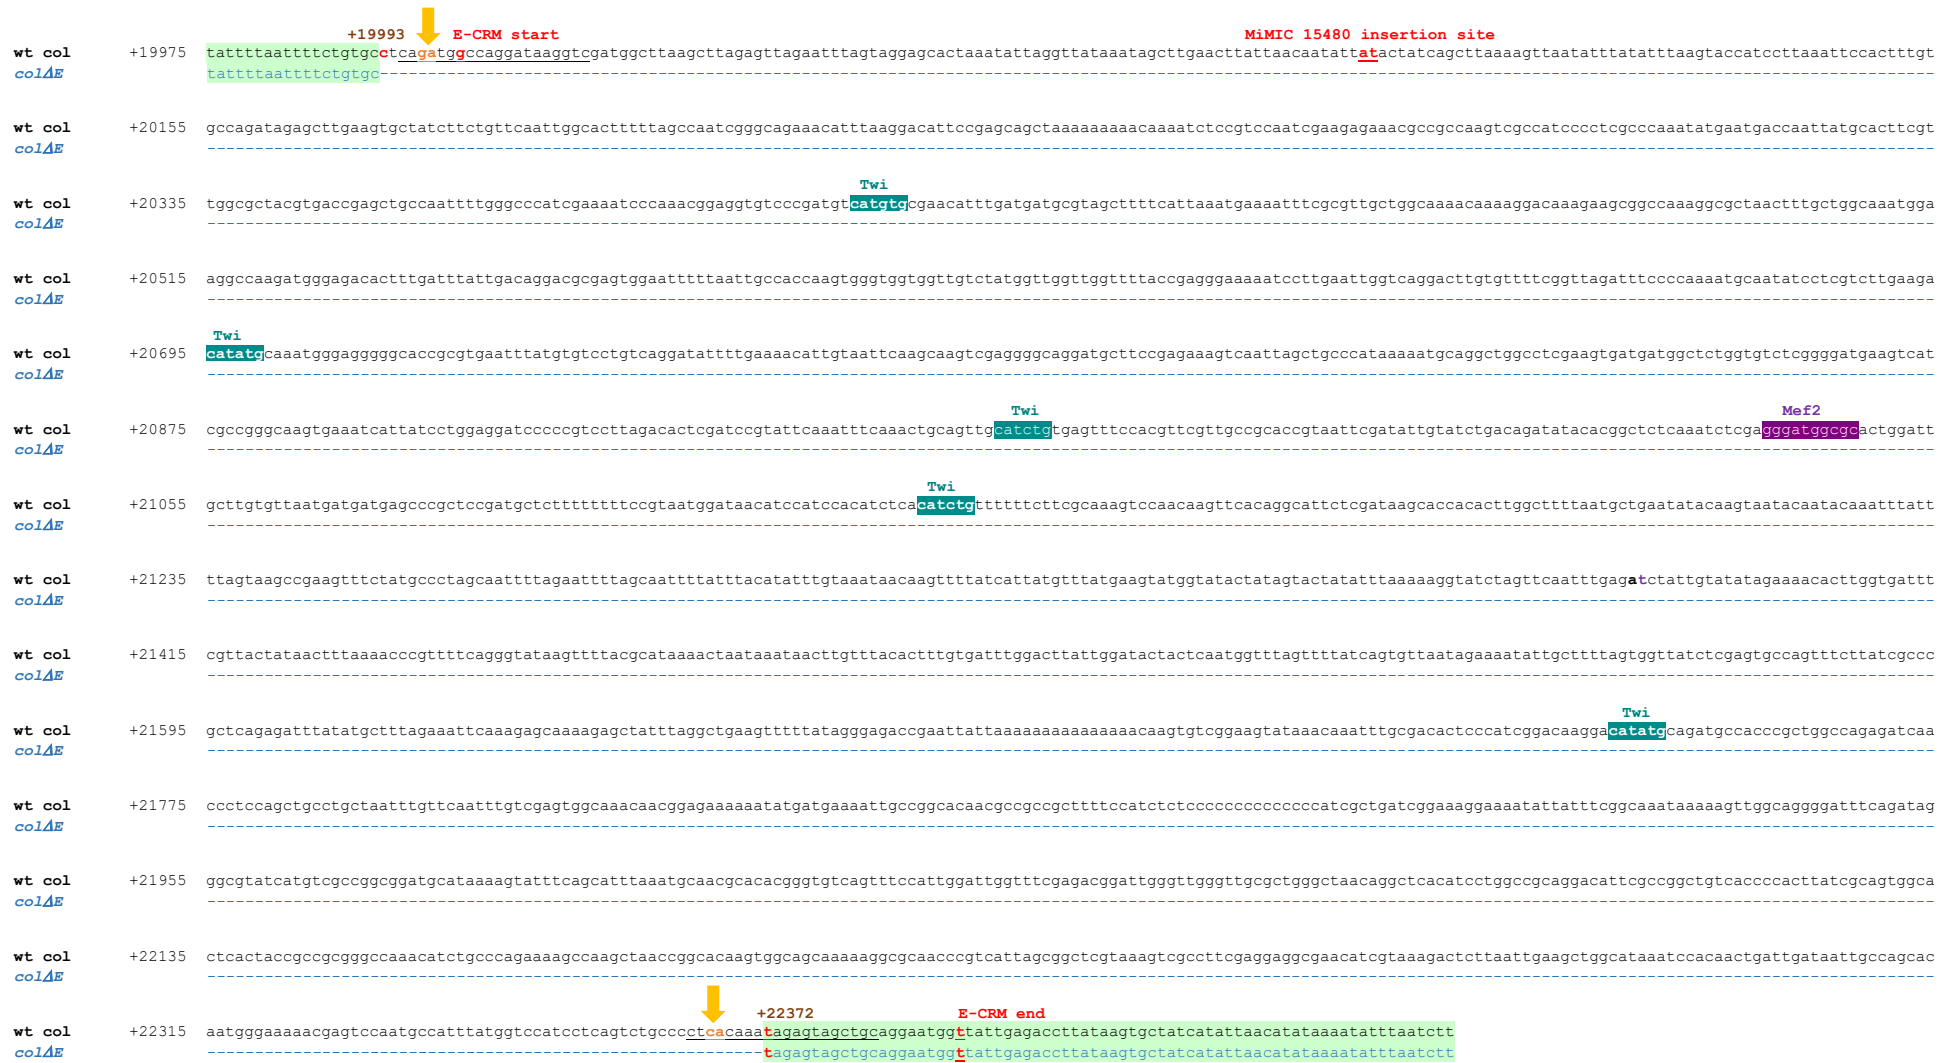

Supplement: supp [file elife-57547-supp-v1.zip › elife_poa_e57547_Figure_1_figure_supplement_1.pdf]

Figure 1 - Sup 2

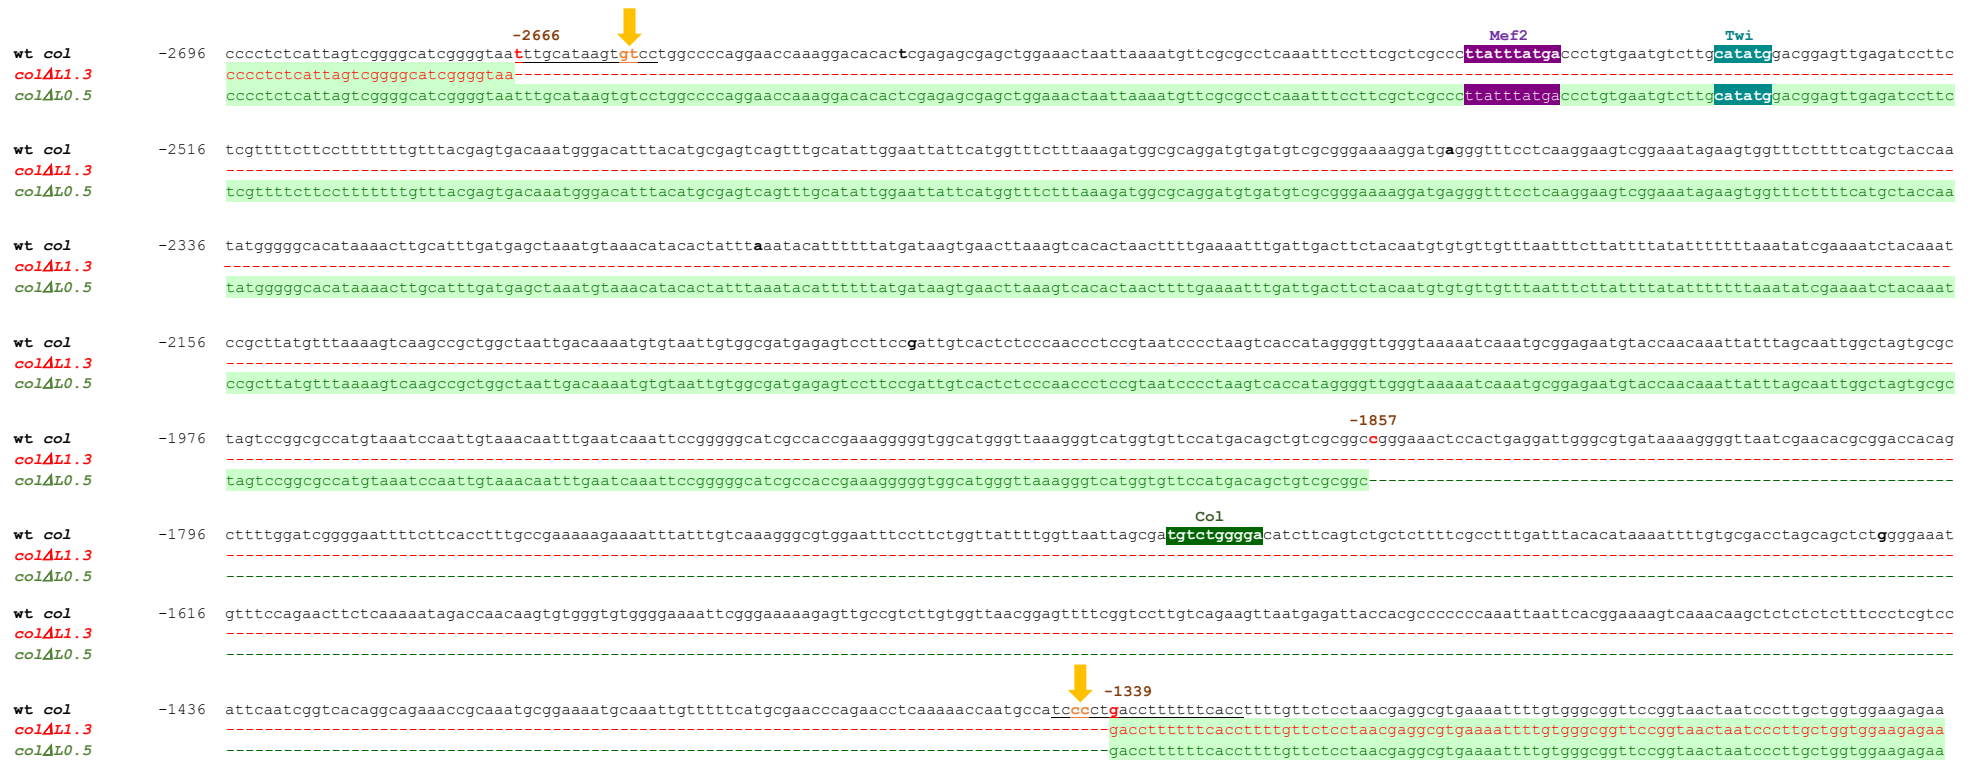

Supplement: supp [file elife-57547-supp-v1.zip › elife_poa_e57547_Figure_1_figure_supplement_2.pdf]

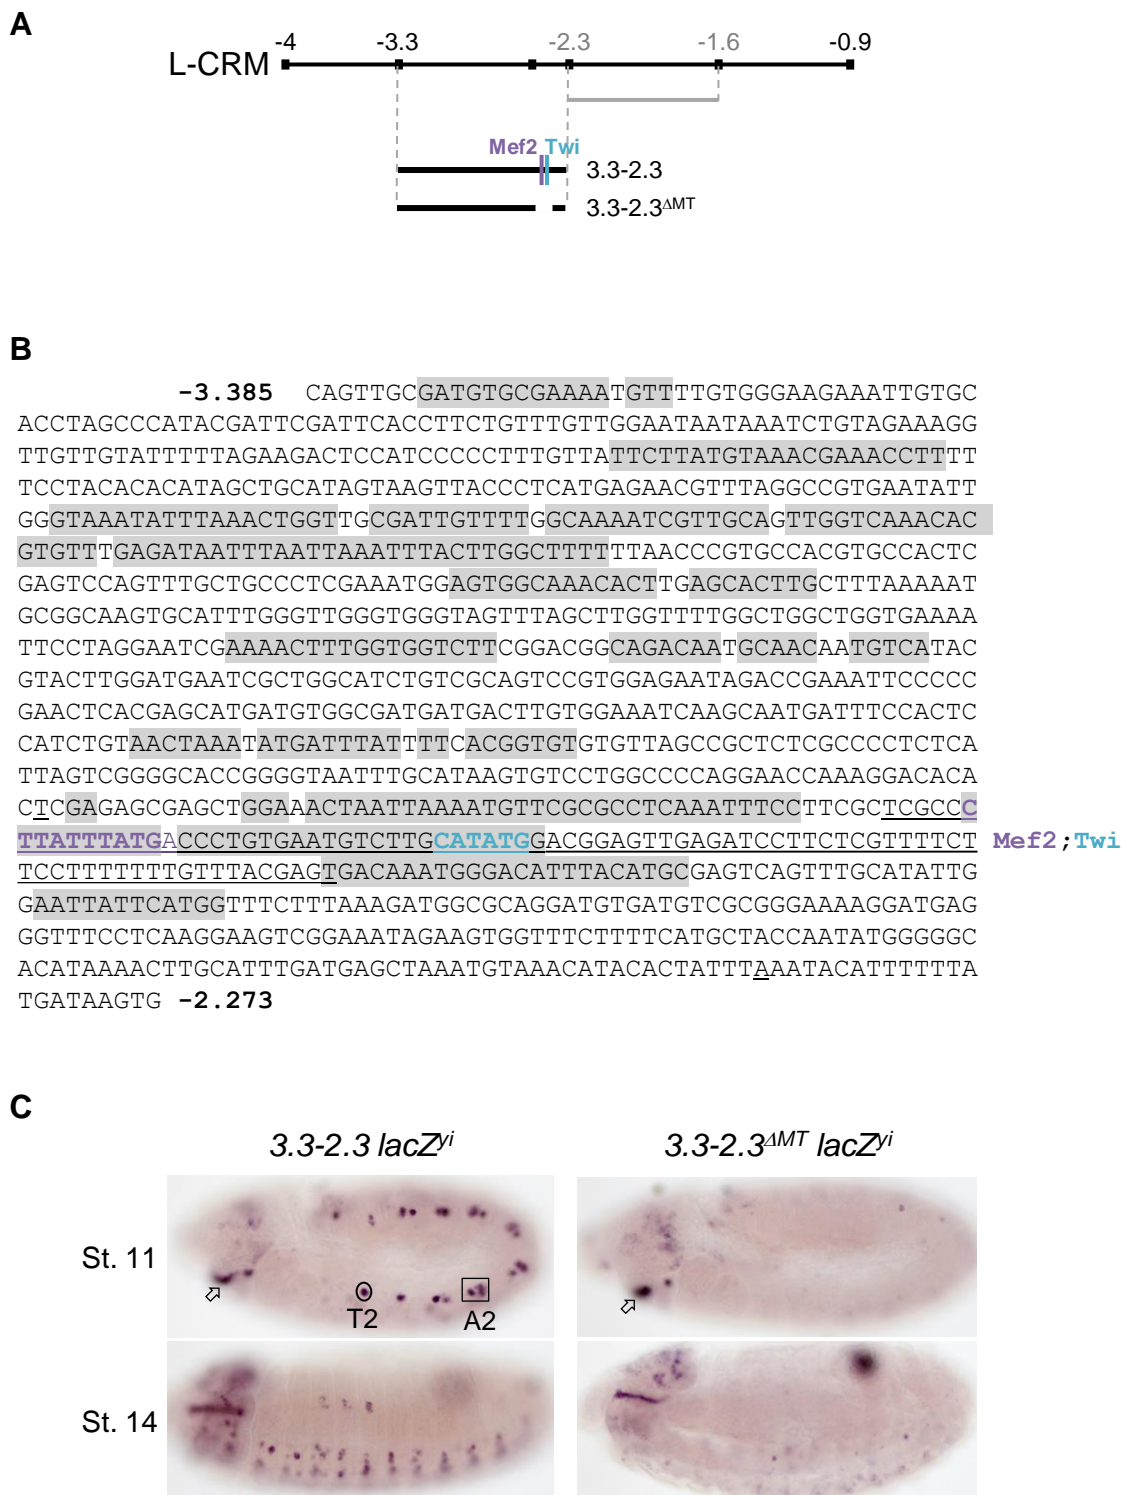

Figure 1 sup 3

Supplement: supp [file elife-57547-supp-v1.zip › elife_poa_e57547_Figure_1_figure_supplement_3.pdf]

*wt/Df*

*col<sup>AL1.3</sup>/Df*

*col<sup>AL0.5</sup>/Df*

md  
↓

md  
↓

md  
↓

st15

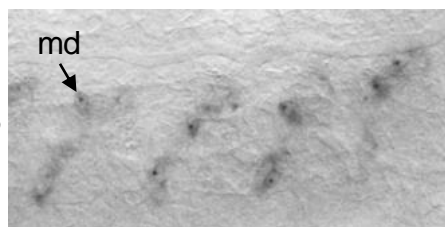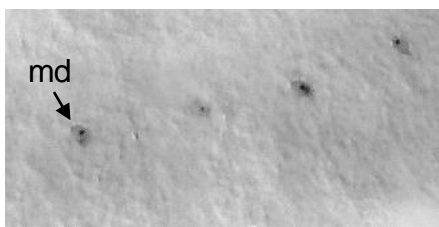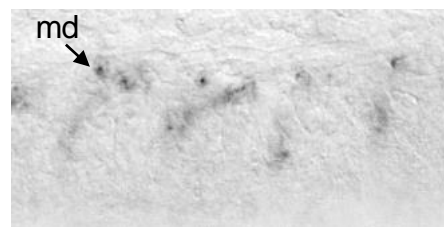

st16

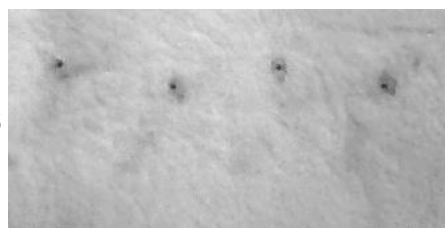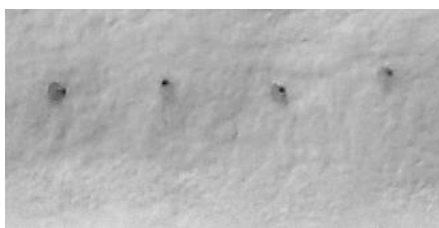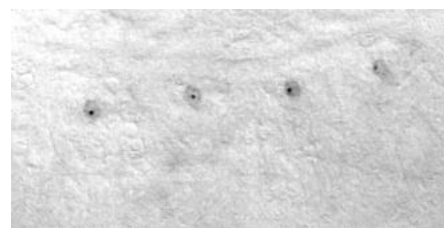

Figure 3 sup1

Supplement: supp [file elife-57547-supp-v1.zip › elife_poa_e57547_Figure_3_figure_supplement_1.pdf]

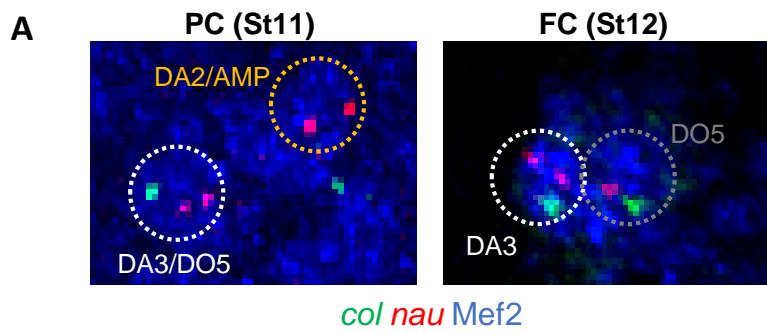

**B**

|                          |            | <i>wt/Df</i> | <i>col<sup>ΔL1.3</sup>/Df</i> | <i>col<sup>ΔL0.5</sup>/Df</i> |
|--------------------------|------------|--------------|-------------------------------|-------------------------------|
| FC/PC<br>intensity ratio | <i>nau</i> | 0.89         | 0.87                          | 0.84                          |
|                          | <i>col</i> | 1.80         | 0.65                          | 1.16                          |

Figure 3 Sup2

Supplement: supp [file elife-57547-supp-v1.zip › elife_poa_e57547_Figure_3_figure_supplement_2.pdf]

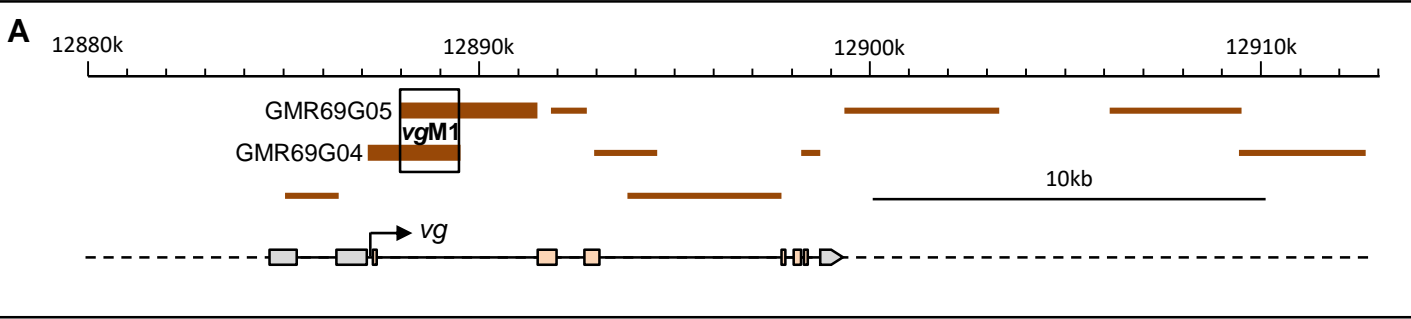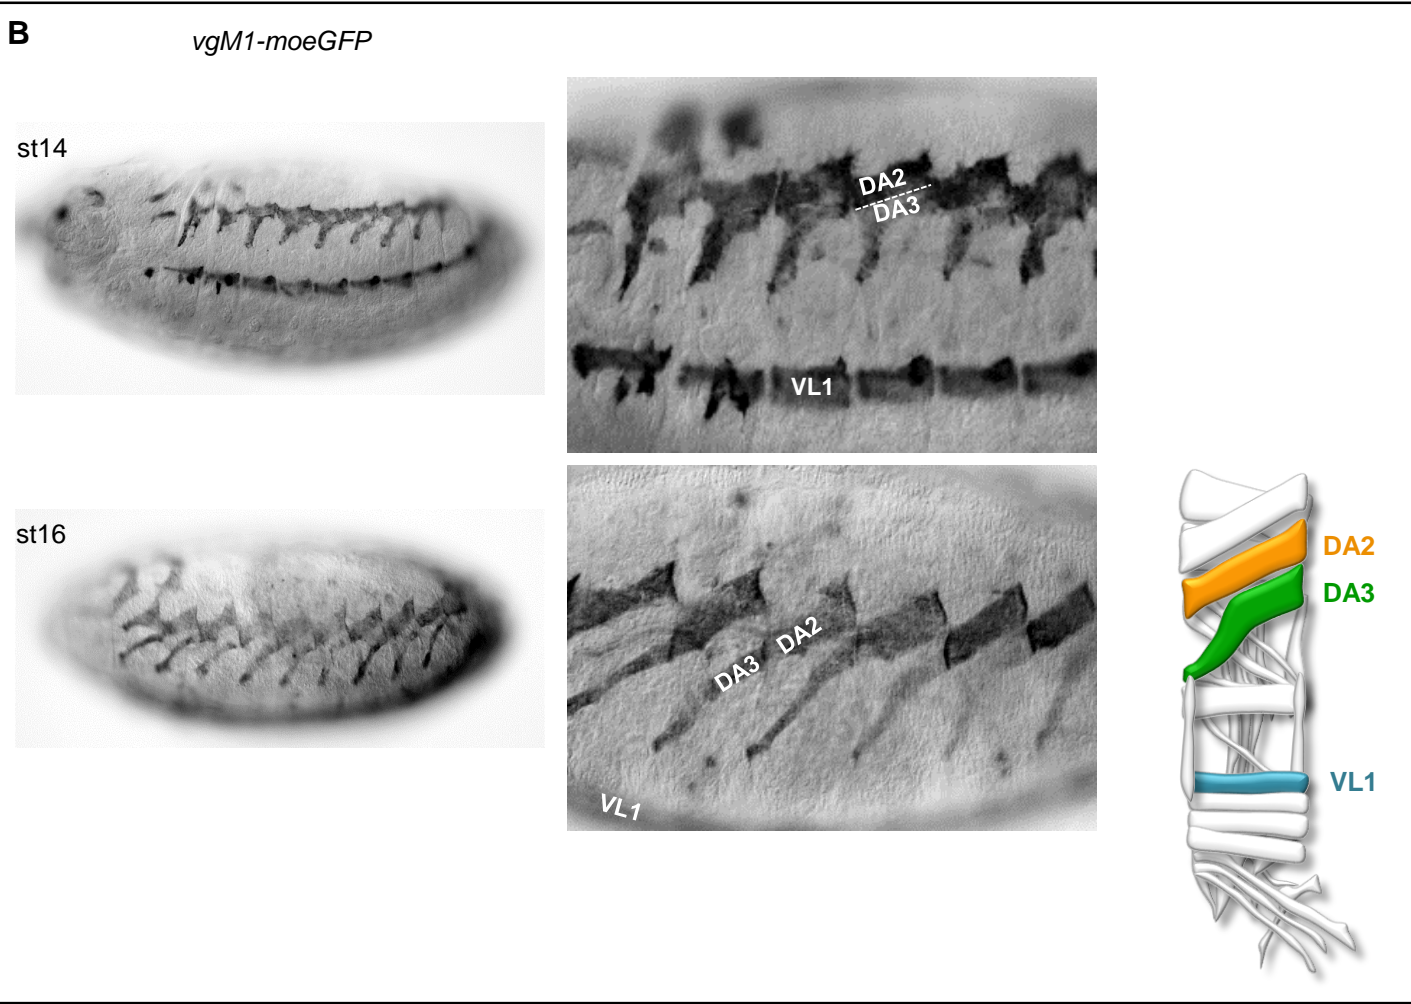

Figure 5 Sup1

Supplement: supp [file elife-57547-supp-v1.zip › elife_poa_e57547_Figure_5_figure_supplement_1.pdf]

Stage 15

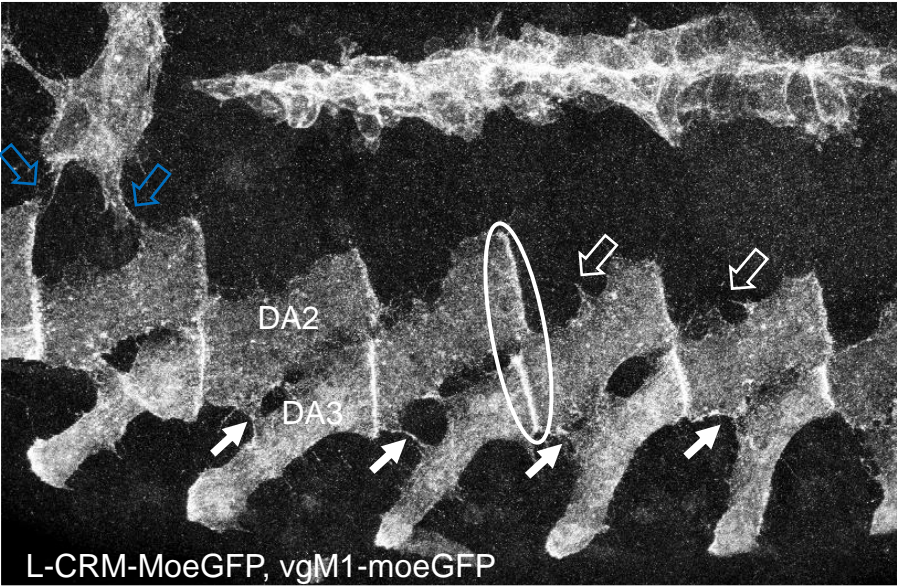

Figure 5 sup 2

Supplement: supp [file elife-57547-supp-v1.zip › elife_poa_e57547_Figure_5_figure_supplement_2.pdf]

WT

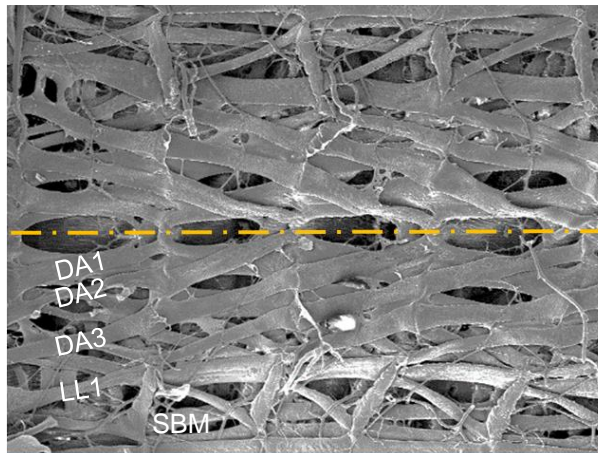

*col<sup>AL1.3</sup>*

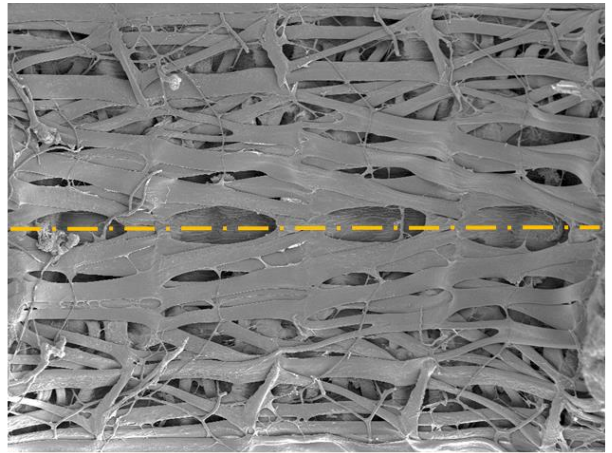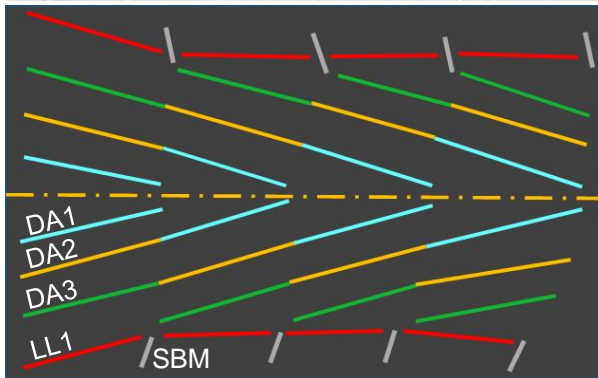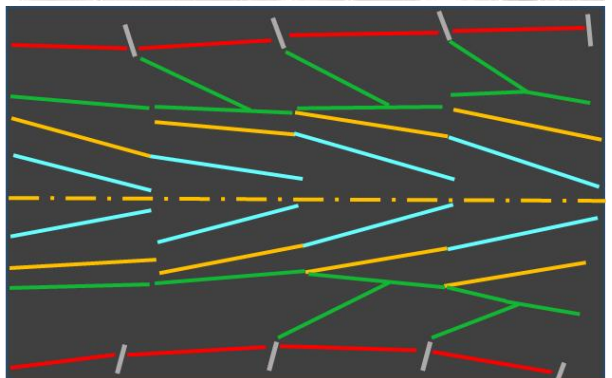

Figure 6 Sup1

Supplement: supp [file elife-57547-supp-v1.zip › elife_poa_e57547_Figure_6_figure_supplement_1.pdf]

WT

*col<sup>AL1.3</sup>*

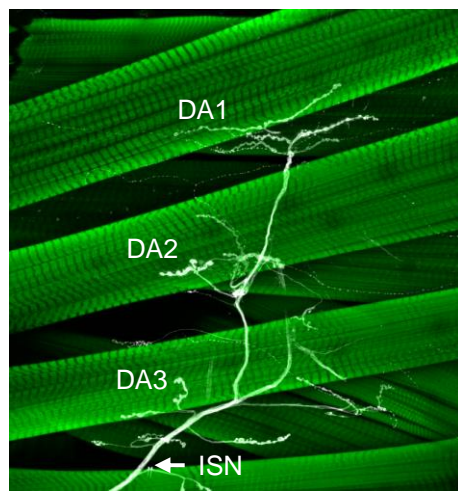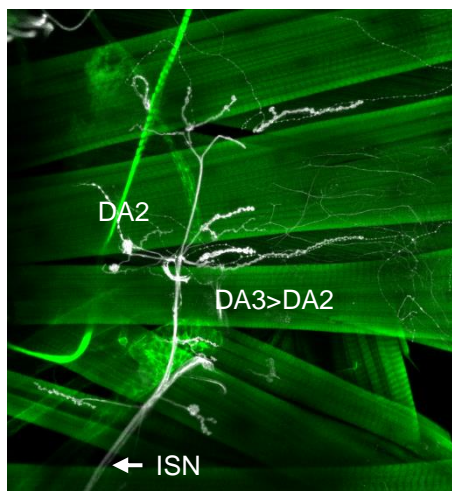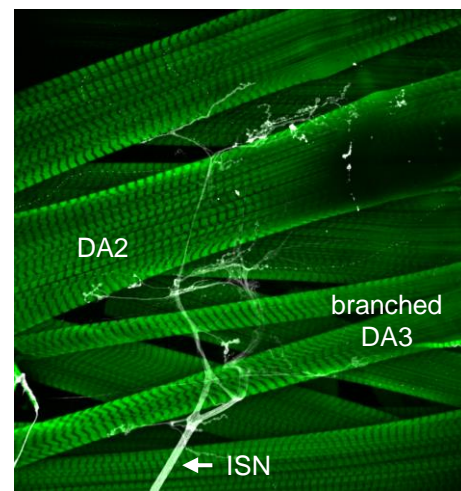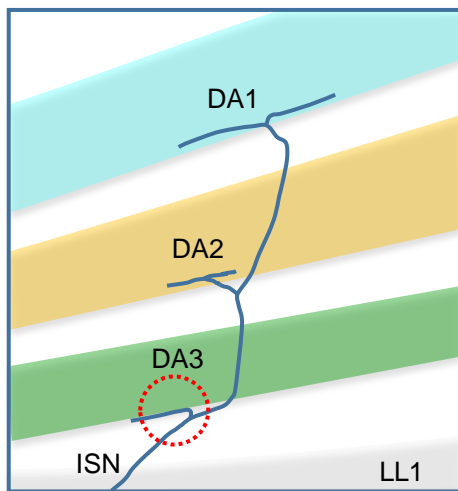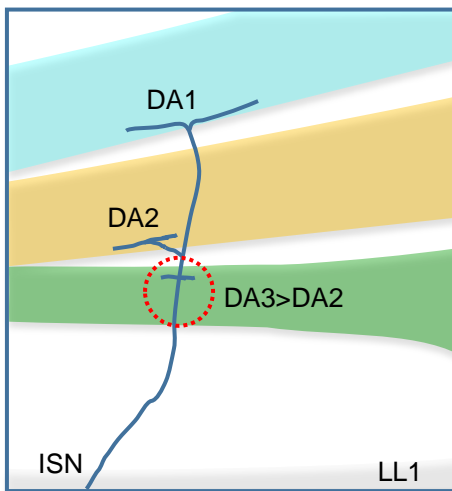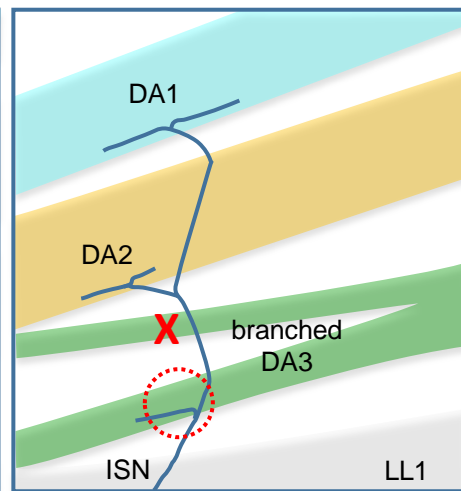

Figure 7 sup1

Supplement: supp [file elife-57547-supp-v1.zip › elife_poa_e57547_Figure_7_figure_supplement_1.pdf]
